# Supplementary material for: Short-term pyrrolidine dithiocarbamate administration attenuates cachexia-induced alterations to muscle and liver in ApcMin/+ mice
Source: PubMed Central journal article supplement (PMC5312326; doi:10.18632/oncotarget.10699), 2016-07-19
Supplement: oncotarget-07-59482-s001.pdf [file oncotarget-07-59482-s001.pdf]

## Short-term pyrrolidine dithiocarbamate administration attenuates cachexia-induced alterations to muscle and liver in *Apc<sup>Min/+</sup>* mice

### SUPPLEMENTARY FIGURE

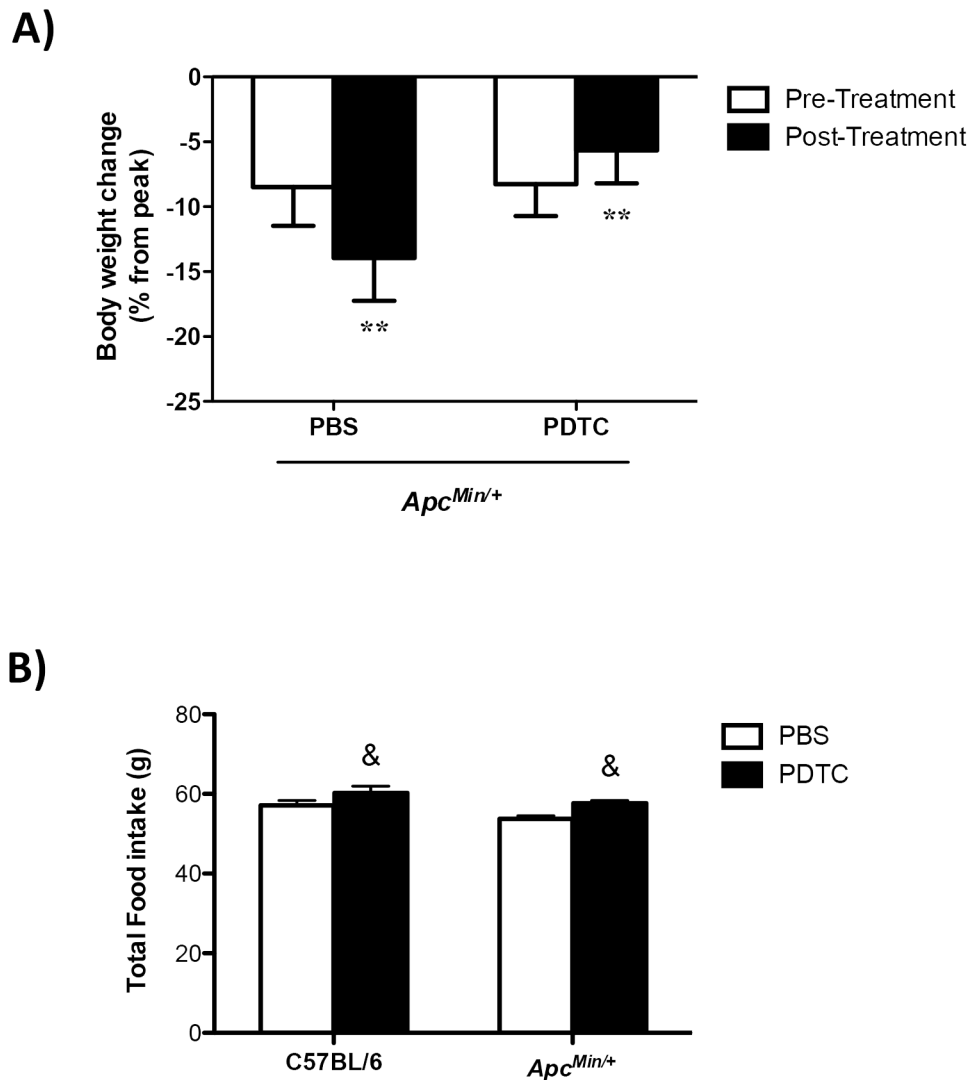

**Supplementary Figure S1: The effect of PDTC treatment on food intake in *Apc<sup>Min/+</sup>* mice.** **A.** The percentage body weight loss pre- and post-treatment in *Apc<sup>Min/+</sup>* mice. At 18 weeks of age C57BL/6 and *Apc<sup>Min/+</sup>* mice were randomized to receive PBS or PDTC (10 mg/kg body weight/day) via intraperitoneal injection for 2 weeks. Mice were sacrificed at 20 weeks of age following a 5 hr fast. **B.** Total food intake over the 2-week treatment period in C57BL/6 and *Apc<sup>Min/+</sup>* mice. C57BL/6 + PBS: N=5, C57BL/6 + PDTC: N=6, *Apc<sup>Min/+</sup>* + PBS: N=5, *Apc<sup>Min/+</sup>* + PDTC: N=7. Values are means  $\pm$  standard error. Significance was set at  $P < 0.05$ . & = signifies main effect of PDTC treatment. \*\* = signifies different to pre-treatment. Abbreviations: PBS, phosphate buffered saline. PDTC, pyrrolidine dithiocarbamate. g, grams.
